# Supplementary material for: Causes of Mortality and Disease in Rabbits and Hares: A Retrospective Study
Source: MDPI journal article supplement (doi:10.3390/ani10010158), 2020-01-17

Supplementary figures:

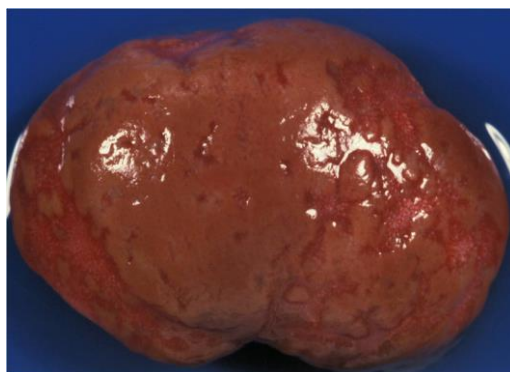

**Figure S1.** Presence of focal, irregular and depressed pale areas on the renal cortical surface in rabbits affected by *Encephalitozoon cuniculi*.

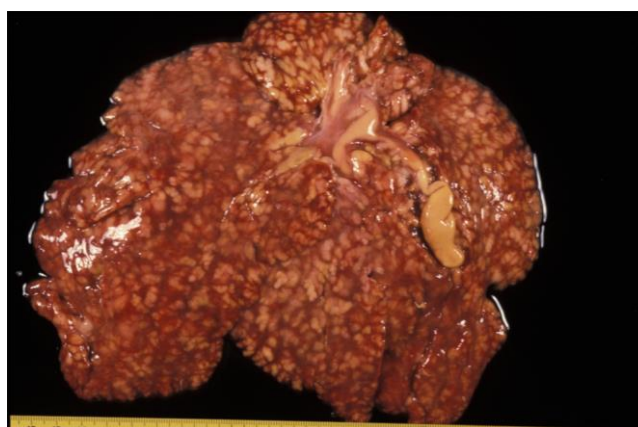

**Figure S2.** Multifocal to coalescing irregularly shaped, raised, yellow-white nodules or cords in liver of farm rabbits affected by *Eimeria stiedae*.

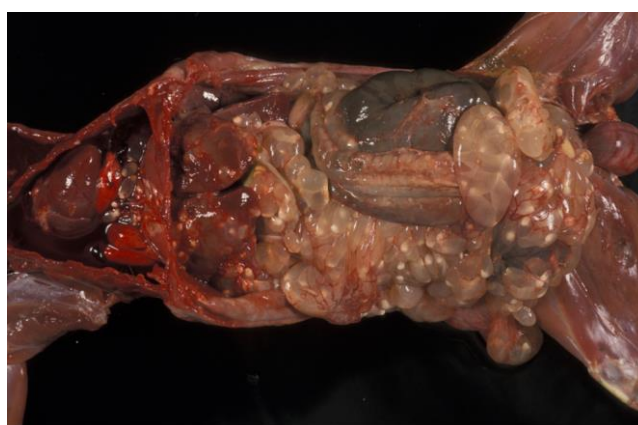

**Figure S3.** Presence of parasitic cysts in liver surface, peritoneal, diaphragmatic and intestinal serosa in a hare affected by *Cysticercus pisiformis*.

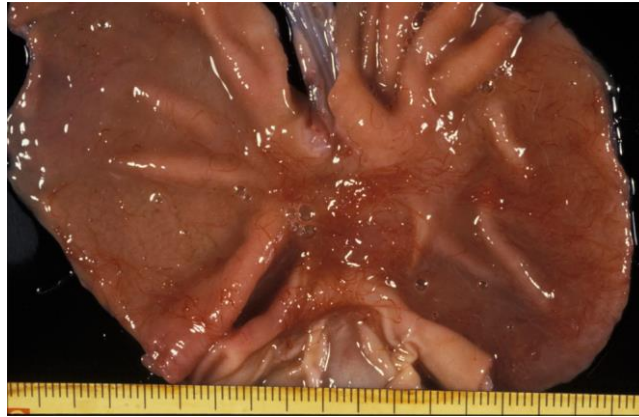

**Figure S4.** Adult red worms of *Graphidium* genus located in gastric mucosa of wild rabbits.

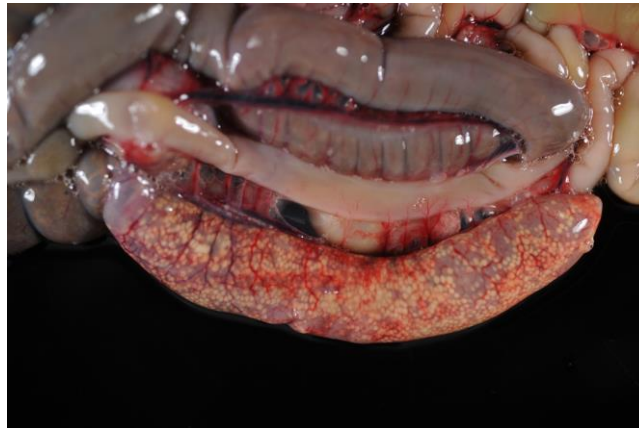

**Figure S5.** Miliary necrotic foci in the intestine of a wild rabbit infected by *Yersinia enterocolitica*.

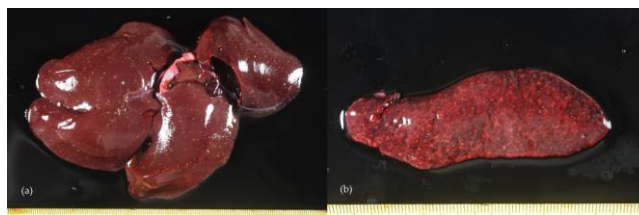

**Figure S6.** Multiple white-yellowish military necrotic foci in liver(a) and spleen (b) in a wild hare suffering tularemia.

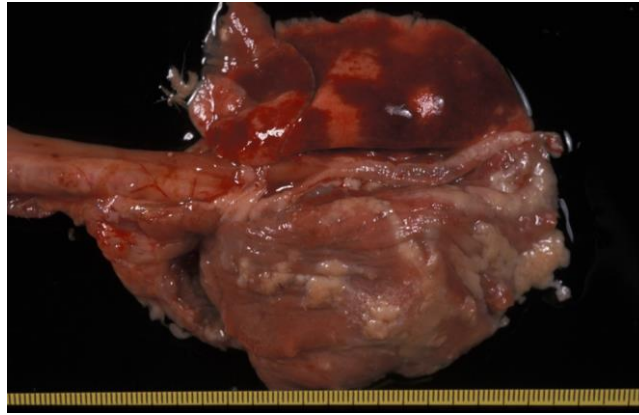

**Figure S7.** Fibrinosuppurative pleuropneumonia associated with *Pasteurella multocida* infection in a farm rabbit.

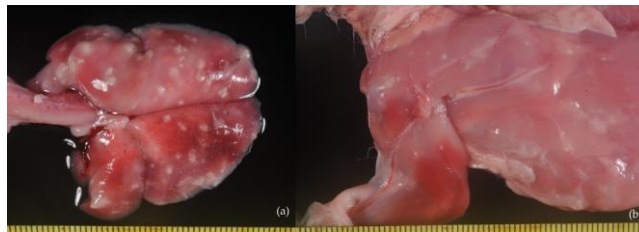

**Figure S8.** Microabscesses in the lung (a) and skeletal muscle (b) in farm rabbit with staphylococcal septicemia.

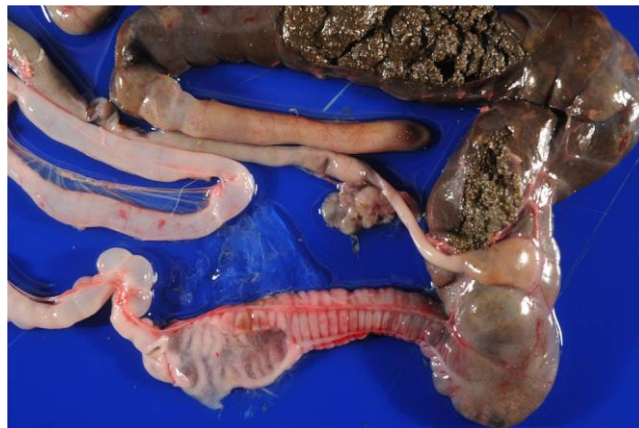

**Figure S9.** Abundant translucent and gelatinous mucus in ileum and impacted cecal content in a farm rabbit affected by Epizootic rabbit enteropathy.

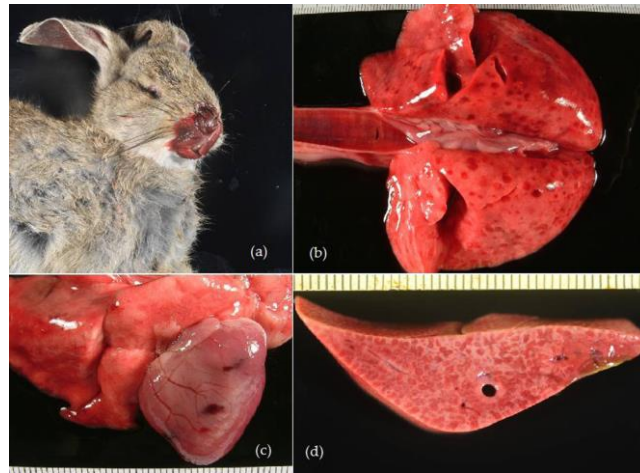

**Figure S10.** Wild rabbit affected by rabbit hemorrhagic disease; (a) serosanguinolent discharge in nose and mouth; Pulmonary (b) and epicardial hemorrhages (c); (d) discolored liver with enhanced lobular pattern.

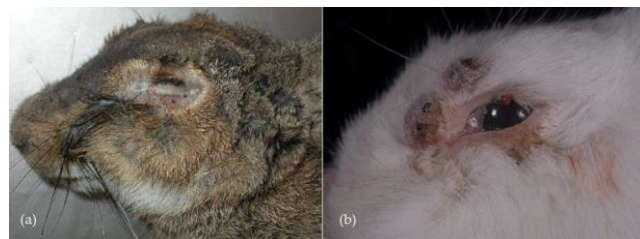

**Figure S11.** Wild and farm rabbits affected by myxomatosis. (a) Serous blepharoconjunctivitis and (b) pseudo-tumors along periorbital area.

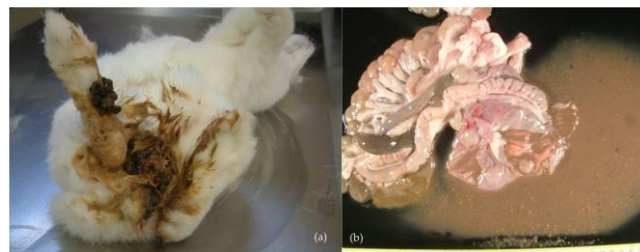

**Figure S12.** Farm rabbit affected by "rabbit enteritis complex". (a) Yellowish-watery diarrhea; (b) severe intestinal dilation, catarrhal enteritis and dysbiosis caused by *Eimeria* spp and *Escherichia coli*.

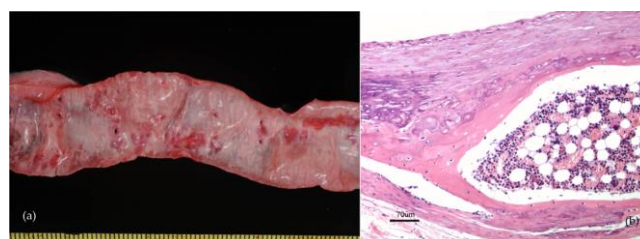



**Figure S13.** Pet rabbit with arterial bone metaplasia. (a) Aortic arteries with a rigid and whitish appearance; (b) foci of cartilaginous and bone metaplasia with bone marrow formation in aortic arteries of a pet rabbit.

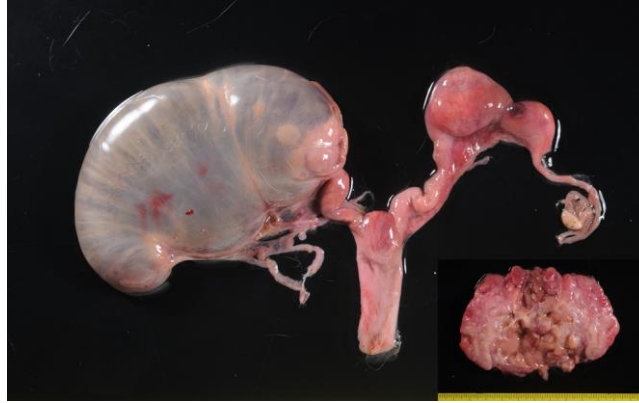

**Figure S14.** gross appearance of the uterus of a pet rabbit with uterine adenocarcinoma.

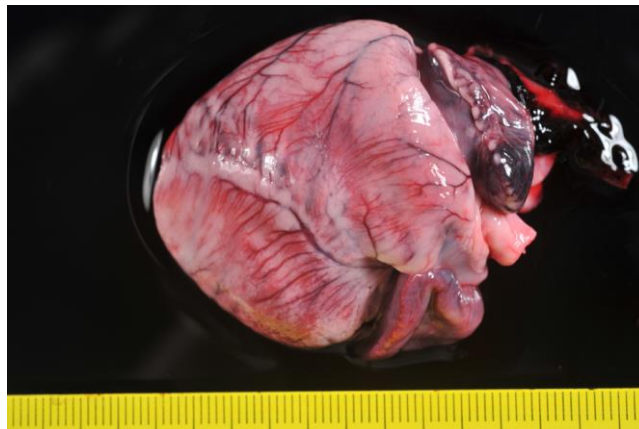

**Figure S15.** discoloration and degeneration of myocardial muscle in a farm rabbit poisoned with monensin.

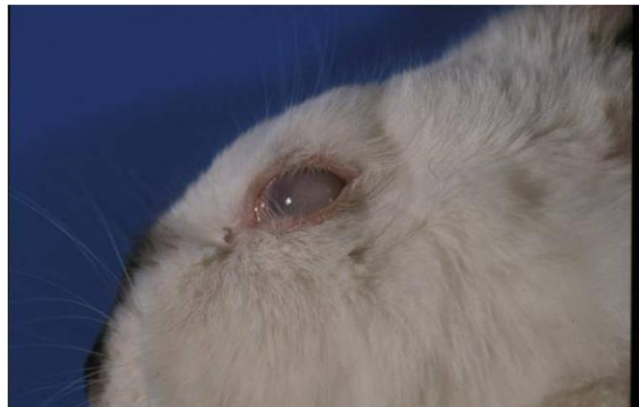

**Figure S16.** corneal opacity and mild buphthalmia in a farm rabbit affected by unilateral congenital glaucoma.

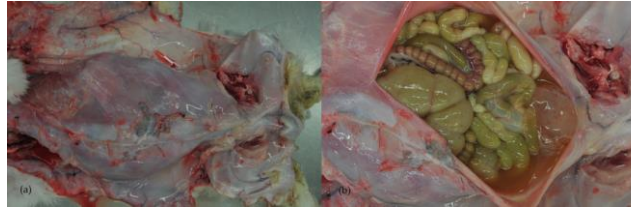

**Figure S17.** generalized subcutaneous non-inflammatory edema (a) and severe ascites (b) in a farm rabbit with renal and hepatic injury.

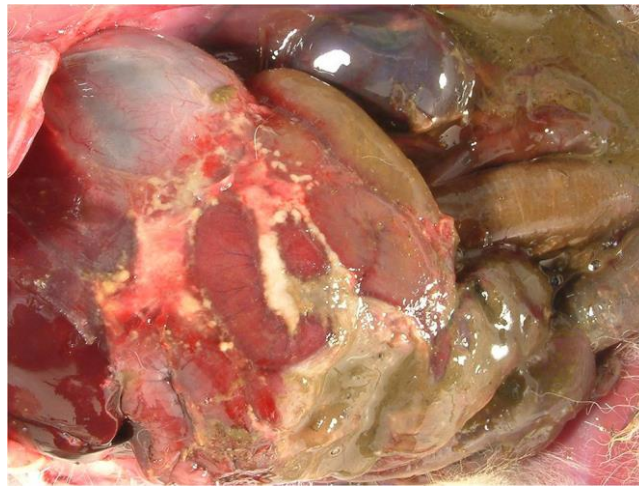

**Figure S18.** Fibrinous peritonitis associated with intestinal rupture due to cecal impaction in a farm rabbit.

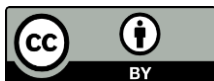

Supplement: s1 [file s1]
